# Supplementary material for: Implementation of EHMRG Risk Model in an Italian Population of Elderly Patients with Acute Heart Failure
Source: MDPI journal article supplement (doi:10.3390/jcm11112982), 2022-05-25
Supplement: s1 [file s1]

# Implementation of EHMRG Risk Model in an Italian Population of Elderly Patients with Acute Heart Failure

## Supplementary Materials

**Table S1.** Differences between surviving and non-surviving patients.

| Clinical Variables                       | Surviving<br>( <i>n</i> = 394) | Non-Surviving<br>( <i>n</i> = 45) | p      |
|------------------------------------------|--------------------------------|-----------------------------------|--------|
| Age, years, ( $\pm$ SD)                  | 84.3 ( $\pm$ 7.65)             | 87.1 ( $\pm$ 8.11)                | 0.024  |
| Males ( <i>n</i> , %)                    | 161 (36.7%)                    | 19 (4.3%)                         | 0.861  |
| NYHA class, [IQR]                        | 2 [1]                          | 3 [1]                             | 0.0001 |
| Length of hospitalization, days, [IQR]   | 11.2 ( $\pm$ 6.92)             | 9.51 ( $\pm$ 7.85)                | 0.121  |
| BNP on admission, pg/ml, [IQR]           | 600.5 [805]                    | 560.5 [846]                       | 0.001  |
| SBP, mmHg, ( $\pm$ SD)                   | 127.5 ( $\pm$ 28.1)            | 128.0 ( $\pm$ 28.2)               | 0.001  |
| HR, bpm, ( $\pm$ SD)                     | 89.4 ( $\pm$ 24.6)             | 90,4 ( $\pm$ 23.9)                | 0.104  |
| SpO2, %, ( $\pm$ SD)                     | 91.8 ( $\pm$ 7.3)              | 92,0 ( $\pm$ 7.07)                | 0.135  |
| Creatinine, mg/dl, ( $\pm$ SD)           | 1.6 ( $\pm$ 1.0)               | 1.45 ( $\pm$ 0.99)                | 0.006  |
| Potassium, mmol/l, ( $\pm$ SD)           | 4.00 ( $\pm$ 0.69)             | 4.04 ( $\pm$ 0.65)                | 0.098  |
| Out of range Potassium, ( <i>n</i> , %)  | 180 (41.1%)                    | 74 (53.6%)                        | 0.016  |
| Troponin, ng/ml, [IQR]                   | 0.05 [0.10]                    | 0.05 [0.11]                       | 0.172  |
| Increased Troponin, ( <i>n</i> , %)      | 204 (46.5%)                    | 63 (45.7%)                        | 0.0001 |
| ED arrival by ambulance, ( <i>n</i> , %) | 284 (64.7%)                    | 83 (60.1%)                        | 0.023  |
| Active cancer, ( <i>n</i> , %)           | 79 (18.0%)                     | 1 (0.2%)                          | 0.003  |
| Metolazone use, ( <i>n</i> , %)          | 9 (2.1%)                       | 3 (0.72%)                         | 0.088  |
| EHMRG, [IQR]                             | 69 [98.4]                      | 60.8 [99,3]                       | 0.0001 |
| EHMRG Class, [IQR]                       | 5 [2]                          | 5 [3]                             | 0.001  |

**Table S2.** Cox regression analysis.

| Panel A: Whole sample ( $n = 439$ ) |        |      |       |       |        |
|-------------------------------------|--------|------|-------|-------|--------|
| Variable                            | B      | HR   | 95%CI |       | p      |
|                                     |        |      | Lower | Upper |        |
| EHRMG Category                      | 1.046  | 2.85 | 1.64  | 4.98  | 0.0001 |
| NYHA Class                          | 1.044  | 2.84 | 1.78  | 4.54  | 0.0001 |
| BNP at the Admission                | 0.000  | 1.00 | 1.00  | 1.00  | 0.297  |
| Sex                                 | -0.121 | 0.89 | 0.43  | 1.81  | 0.740  |
| Panel B: Seven days ( $n=138$ )     |        |      |       |       |        |
| Variable                            | B      | HR   | 95%CI |       | P      |
|                                     |        |      | Lower | Upper |        |
| EHRMG Category                      | 0.977  | 2.66 | 1.36  | 4.97  | 0.004  |
| NYHA Class                          | 0.928  | 2.53 | 1.13  | 5.64  | 0.023  |
| BNP at the Admission                | 0.000  | 1.00 | 1.00  | 1.00  | 0.156  |
| Sex                                 | -0.626 | 0.53 | 0.18  | 1.56  | 0.252  |

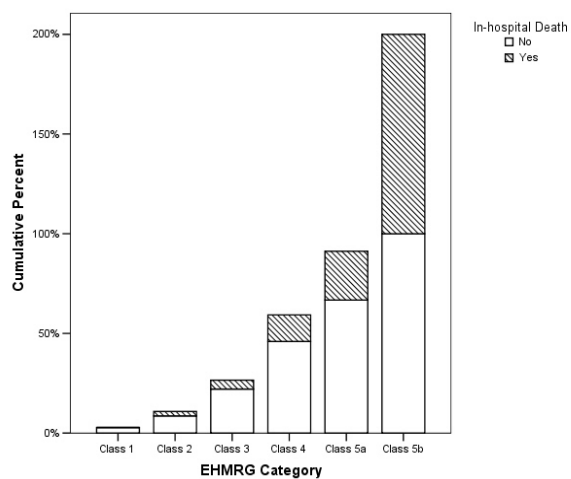Panel A. Whole sample ( $n=439$ )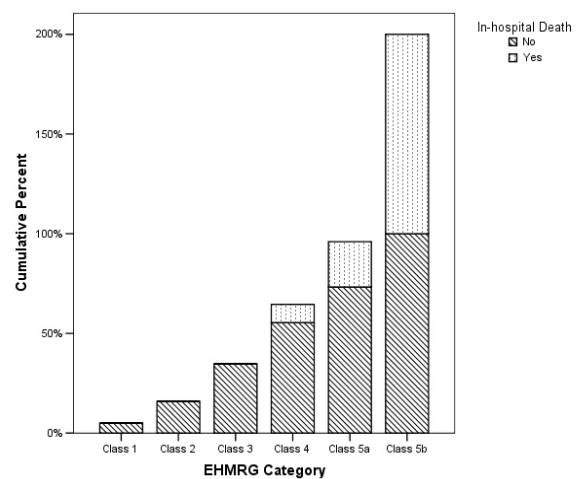Panel B. 7-days ( $n=138$ )**Figure S1.** Cumulative percentage of in-hospital deaths according to EHRMG ( $p < 0.0001$ ).

Filename: jcm-1733105-supplementary.docx  
Directory: E:\5.25\sensors-1733280  
Template: C:\Users\MDPI\AppData\Roaming\Microsoft\Templates\Normal.dotm  
Title:  
Subject:  
Author: Lorenzo Falsetti  
Keywords:  
Comments:  
Creation Date: 3/15/2022 7:20:00 PM  
Change Number: 6  
Last Saved On: 5/25/2022 3:01:00 PM  
Last Saved By: MDPI-52  
Total Editing Time: 16 Minutes  
Last Printed On: 5/25/2022 6:32:00 PM  
As of Last Complete Printing  
Number of Pages: 2  
Number of Words: 313 (approx.)  
Number of Characters: 1,549 (approx.)
